# Supplementary material for: Experimental Study on Seepage Characteristics of Jurassic Weakly Cemented Sandstone under Water-Rock Interaction
Source: Hindawi journal article supplement (doi:10.1155/2020/8543687), 2020-05-21
Supplement: f1 [file 8543687.f1.docx]

S1 Technology methodology of this study


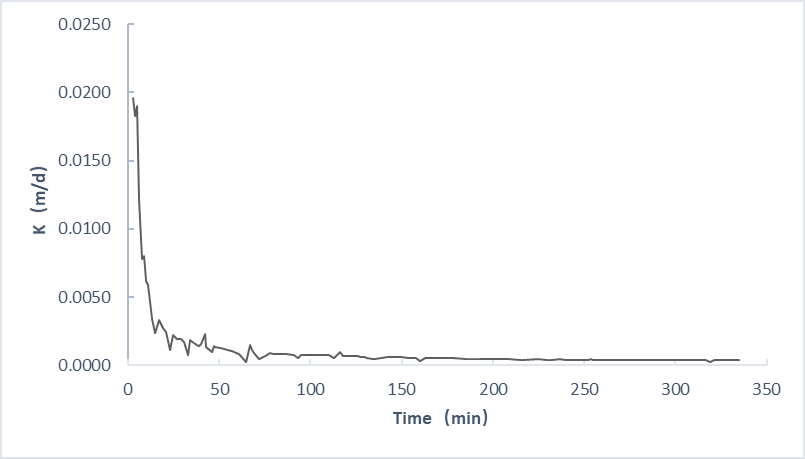


S2 The hydraulic conductivity curve of YP-6
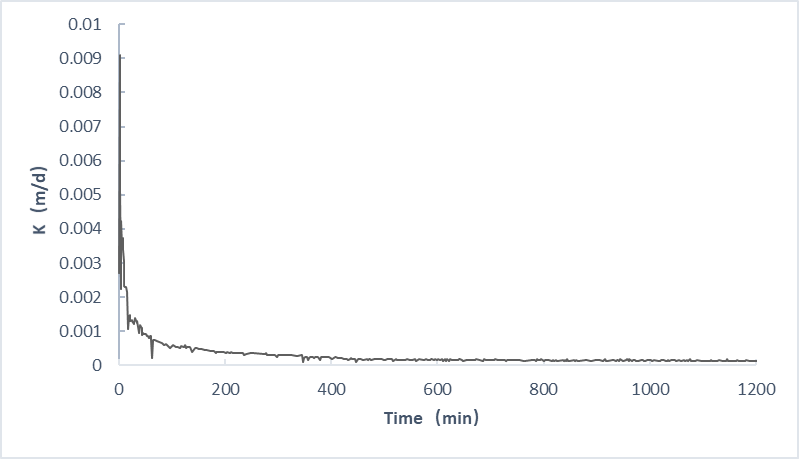


S3 The hydraulic conductivity curve of YP-14


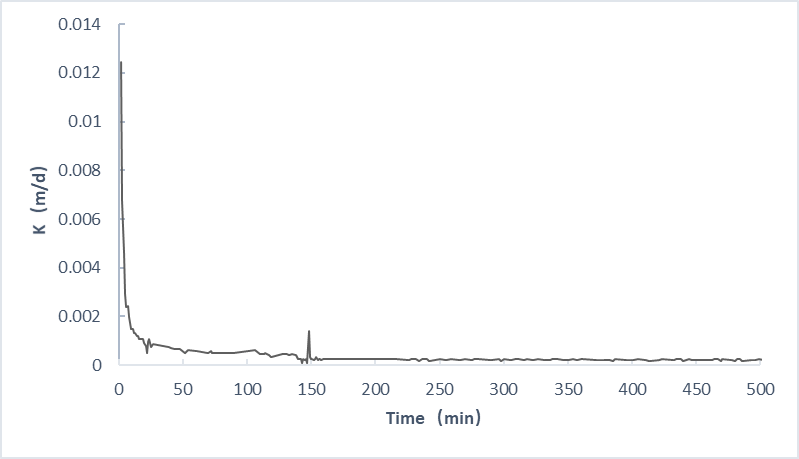


S4 The hydraulic conductivity curve of YP-22


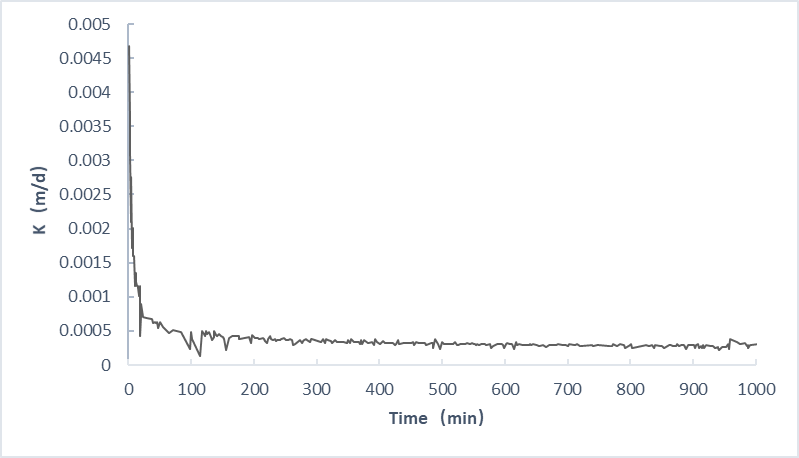


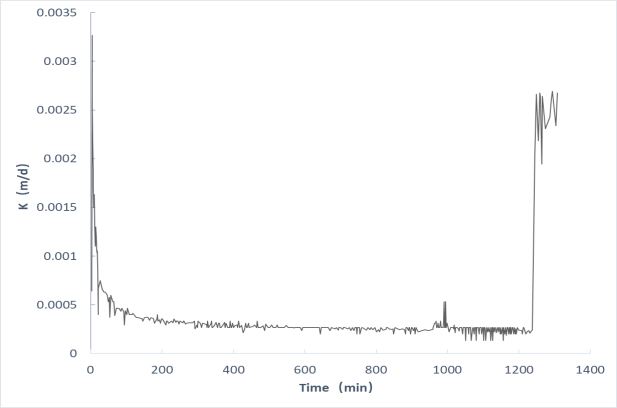
S5 The hydraulic conductivity curve of YP-23

S6 The hydraulic conductivity curves of YP-21
